# Supplementary material
Source: MDPI journal article supplement (https://www.mdpi.com/2673-9623/3/1/6)
Supplement: s1 [file s1 › appliedchem-2120329-supplementary.pdf]

# Volatile Aroma Compounds of Gavina<sup>®</sup> Watermelon (*Citrullus Lanatus* L.) Dietary Fibers to Increase Food Sustainability

Veronica D'Eusanio, Laura Maletti, Andrea Marchetti, Fabrizio Roncaglia and Lorenzo Tassi

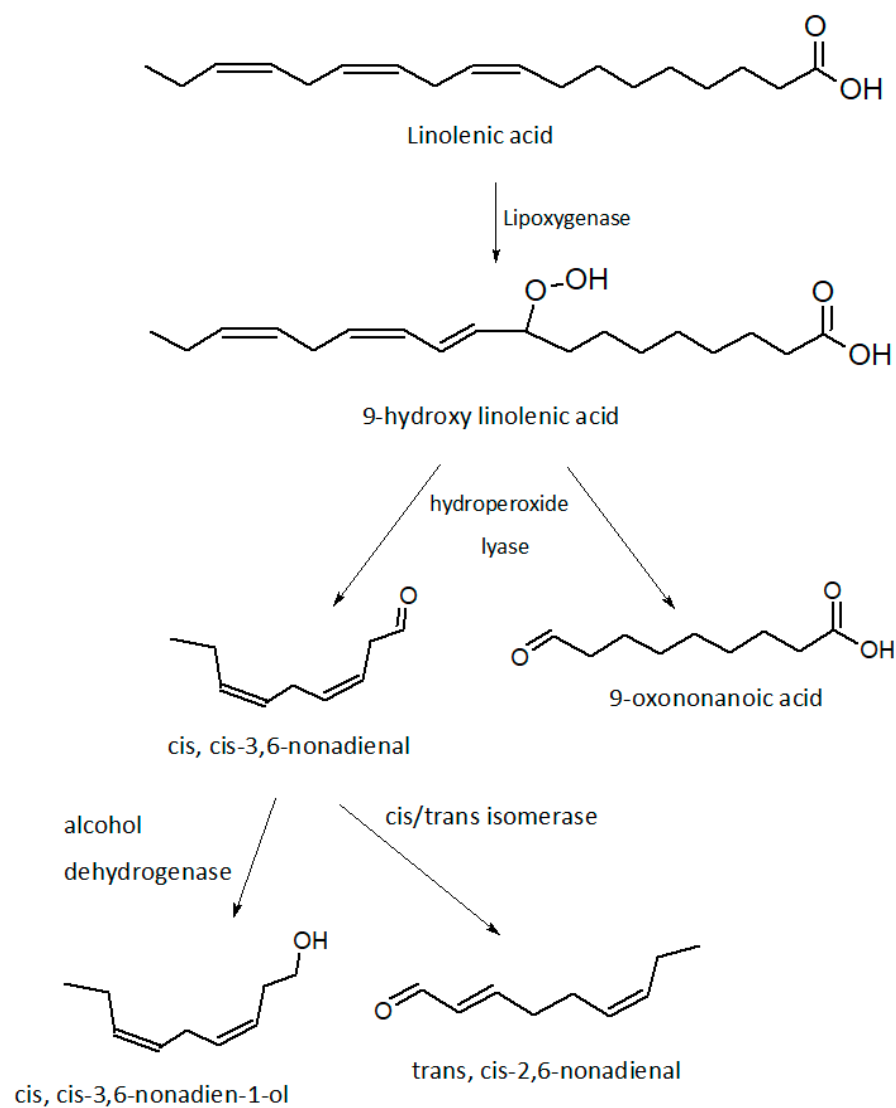

**Figure S1.** Proposed biosynthetic pathway for watermelon VOCs: Linolenic acid degradation.

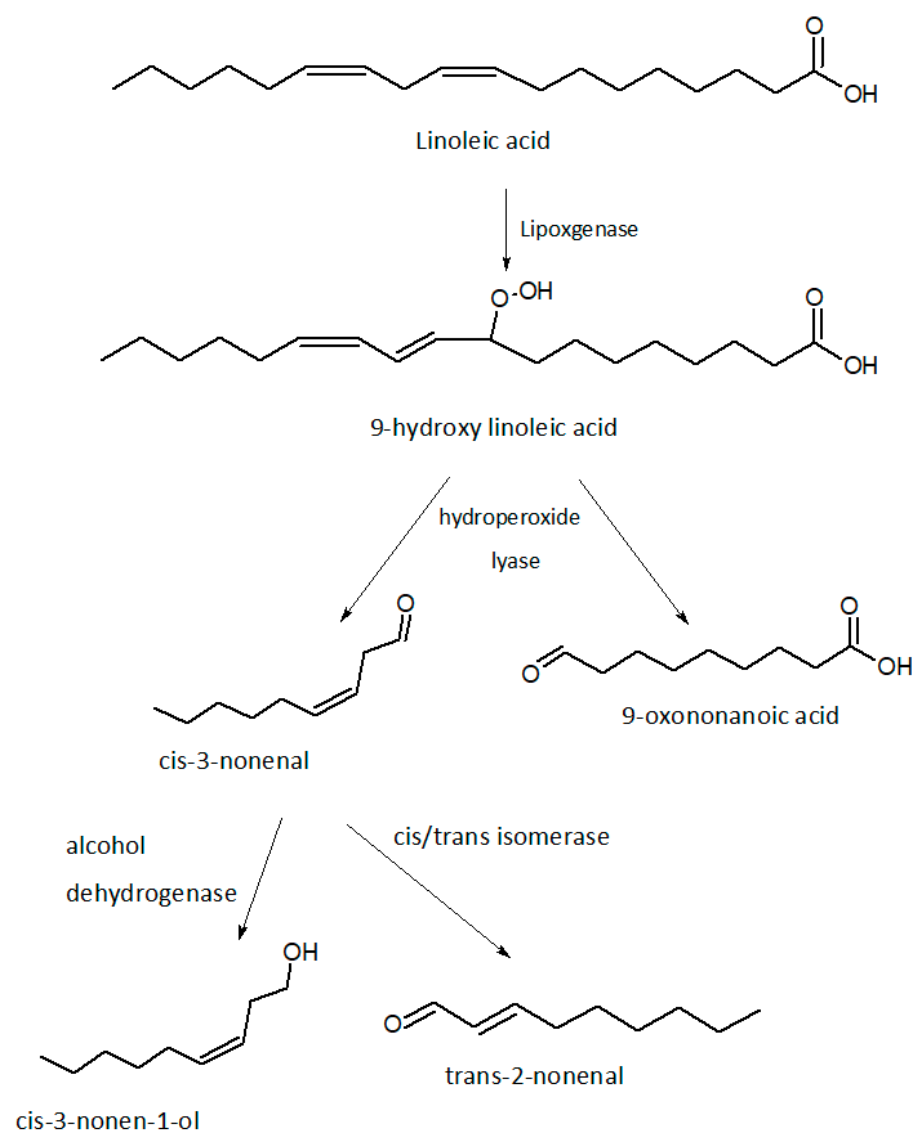

**Figure S2.** Proposed biosynthetic pathway for watermelon VOCs: Linoleic acid degradation.

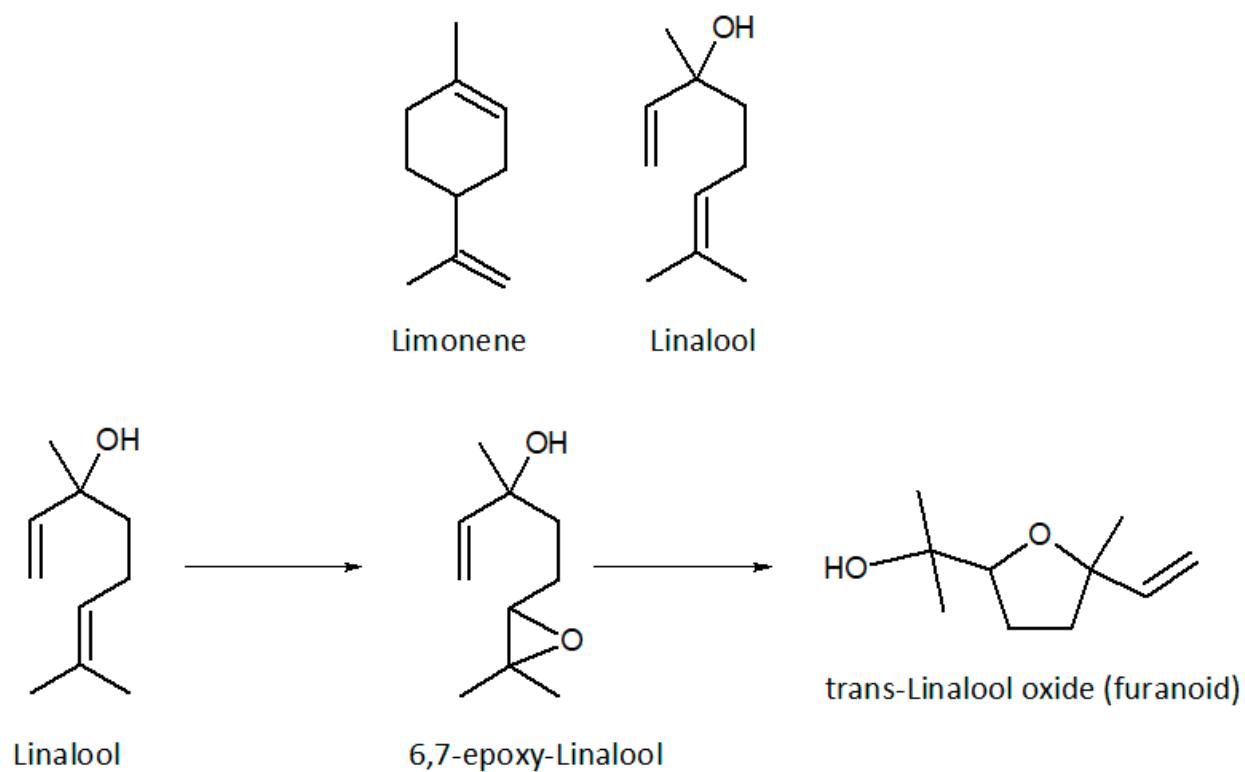

**Figure S3.** Epoxidation of linalool to linalool oxide.

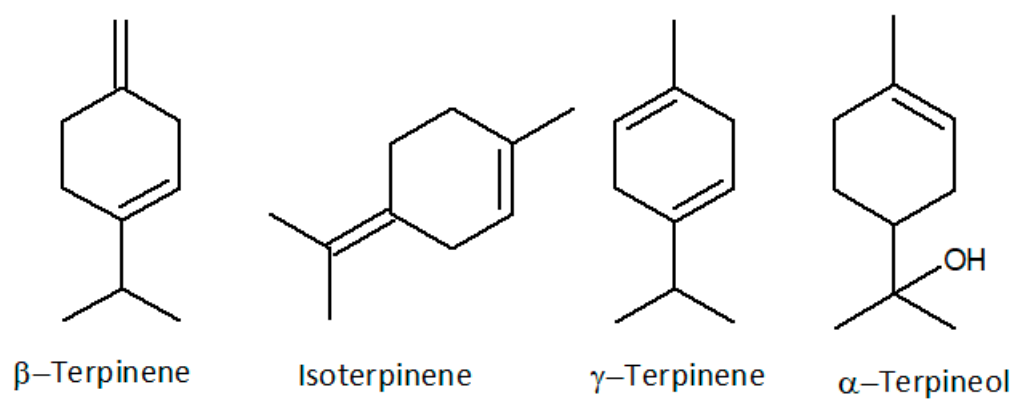

**Figure S4.** Structure of some cyclic monoterpenes identified in the WDF samples.

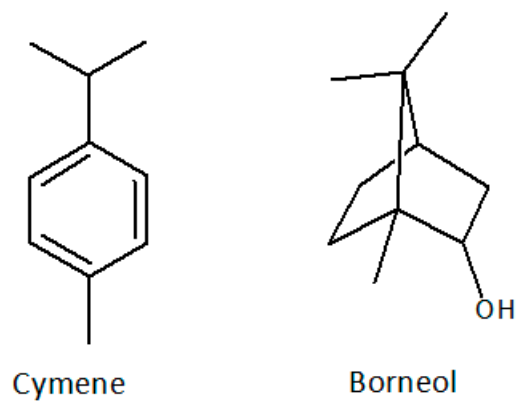

**Figure S5.** Chemical structure of cymene (left) and borneol (right).

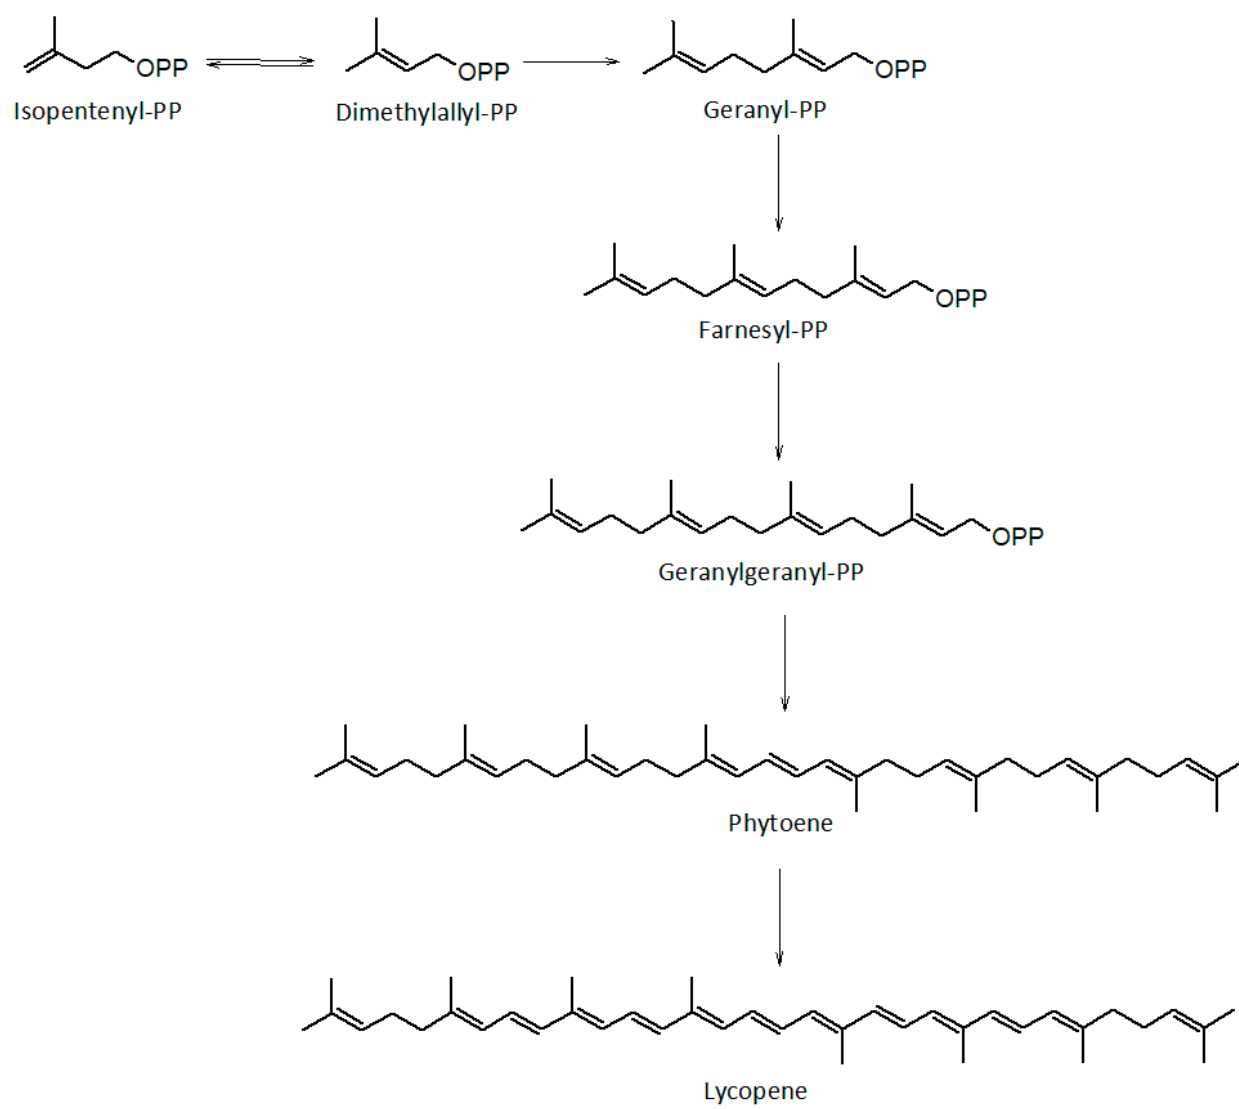

**Figure S6.** Lycopene, a carotenoid biosynthesized starting from geranyl pyrophosphate.
